# Supplementary material
Source: MDPI journal article supplement (https://www.mdpi.com/2075-163X/11/7/780)
Supplement: s1 [file s1]

**Table S1. EMP analyses of Ti-oxynitride inclusions**

| mount/grain   | Ti<br>weight % | Cr   | V    | Si   | C   | N    | O    | Total |
|---------------|----------------|------|------|------|-----|------|------|-------|
| Mt 1 1124/2-1 | 76.7           | 0.00 | 0.02 | 0.00 | 3.8 | 14.7 | 5.8  | 101.1 |
| Mt 1 1124/2-2 | 77.0           | 0.08 | 0.35 | 0.01 | 8.0 | 11.9 | 4.2  | 101.5 |
| Mt 1 1124/2-3 | 76.8           | 0.00 | 0.01 | 0.00 | 3.5 | 14.7 | 5.8  | 100.9 |
| 1124A/3       | 76.3           | 0.00 | 0.15 | 0.01 | 0.0 | 16.7 | 8.9  | 102.1 |
| 1124A/3       | 76.8           | 0.02 | 0.09 | 0.00 | 0.0 | 16.2 | 8.1  | 101.2 |
| 1124A/3       | 76.2           | 0.00 | 0.02 | 0.01 | 0.0 | 16.7 | 9.5  | 102.4 |
| 1124A/3       | 73.7           | 0.00 | 0.05 | 0.11 | 1.0 | 14.5 | 10.9 | 100.3 |
| 1124A/3       | 76.9           | 0.00 | 0.12 | 0.01 | 0.0 | 16.5 | 8.7  | 102.3 |
| 1124A/10      | 73.9           | 0.00 | 0.12 | 0.00 | 0.0 | 16.3 | 13.7 | 104.1 |
| 1124A/11      | 77.3           | 0.00 | 0.13 | 0.01 | 0.0 | 17.1 | 7.0  | 101.5 |
| 1124A/11      | 77.4           | 0.03 | 0.10 | 0.01 | 3.0 | 14.2 | 6.2  | 100.9 |
| 1124B/15      | 75.0           | 0.00 | 0.07 | 0.02 | 2.5 | 14.2 | 9.4  | 101.3 |
| 1124B/15      | 74.6           | 0.00 | 0.09 | 0.02 | 2.0 | 14.5 | 9.0  | 100.2 |
| 1124B/7       | 75.2           | 0.00 | 0.48 | 0.24 | 6.0 | 9.7  | 7.7  | 99.2  |
| 1124B/7       | 74.3           | 0.00 | 0.24 | 0.01 | 5.2 | 12.8 | 9.5  | 102.1 |
| 1124B/3       | 72.2           | 0.22 | 1.07 | 0.37 | 2.5 | 15.3 | 7.2  | 99.4  |
| 1124B/3       | 76.5           | 0.09 | 0.22 | 0.01 | 7.0 | 12.9 | 5.1  | 101.8 |
| 1124C/1       | 74.5           | 0.02 | 0.07 | 0.01 | 2.0 | 12.5 | 8.5  | 97.5  |
| 1124C/1       | 76.9           | 0.01 | 0.07 | 0.01 | 4.0 | 13.8 | 4.8  | 99.6  |
| 1124C/1       | 76.9           | 0.03 | 0.07 | 0.01 | 5.0 | 11.7 | 5.0  | 98.8  |
| 1124C/3       | 75.9           | 0.04 | 0.12 | 0.01 | 0.0 | 16.6 | 8.4  | 101.0 |
| 1124C/3       | 75.1           | 0.00 | 0.06 | 0.02 | 0.0 | 15.0 | 10.9 | 101.1 |
| 1124C/3       | 76.8           | 0.07 | 0.34 | 0.00 | 0.0 | 15.7 | 6.7  | 99.6  |
| 1124C/3       | 76.8           | 0.04 | 0.23 | 0.00 | 0.0 | 15.5 | 7.3  | 99.9  |
| 1124C/4       | 75.2           | 0.01 | 0.15 | 0.00 | 1.0 | 17.3 | 5.5  | 99.1  |
| 1124C/4       | 74.4           | 0.02 | 0.06 | 0.01 | 0.0 | 15.2 | 10.0 | 99.7  |
| 1124C/8       | 76.0           | 0.00 | 0.21 | 0.00 | 0.0 | 17.4 | 4.1  | 97.7  |
| 1124C/8       | 74.1           | 0.00 | 0.10 | 0.01 | 0.0 | 15.3 | 10.3 | 99.8  |
| 1124C/9       | 71.8           | 0.00 | 0.01 | 0.03 | 0.0 | 12.8 | 12.1 | 96.8  |
| 1124C/9       | 74.2           | 0.02 | 0.08 | 0.01 | 0.0 | 14.9 | 10.8 | 99.9  |
| 1124C/9       | 73.8           | 0.00 | 0.07 | 0.01 | 0.0 | 14.6 | 11.0 | 99.5  |
| 1124C/9       | 72.3           | 0.03 | 0.07 | 0.02 | 1.0 | 13.9 | 12.0 | 99.3  |
| 1124C/9       | 73.0           | 0.01 | 0.06 | 0.02 | 0.3 | 14.0 | 11.5 | 98.9  |
| 1124D/1       | 75.4           | 0.00 | 0.10 | 0.01 | 2.0 | 13.1 | 8.2  | 98.9  |
| 1124D/1       | 75.6           | 0.01 | 0.10 | 0.01 | 1.7 | 15.3 | 8.2  | 100.8 |
| 1124D/1       | 73.8           | 0.05 | 0.03 | 0.02 | 0.0 | 14.1 | 11.8 | 99.8  |
| 1124D/2       | 76.1           | 0.00 | 0.16 | 0.02 | 0.0 | 18.0 | 4.5  | 98.8  |
| 1124D/2       | 72.7           | 0.06 | 0.11 | 0.03 | 2.5 | 13.9 | 10.6 | 99.9  |
| 1124D/2       | 74.8           | 0.00 | 0.09 | 0.02 | 1.7 | 14.5 | 8.0  | 99.1  |
| 1124D/2       | 72.1           | 0.00 | 0.19 | 0.30 | 2.1 | 12.8 | 10.1 | 97.6  |

|              |      |      |      |      |      |      |      |       |
|--------------|------|------|------|------|------|------|------|-------|
| 1124D/4      | 73.3 | 0.00 | 0.17 | 0.06 | 2.0  | 13.9 | 11.6 | 101.0 |
| 1124E/1      | 75.6 | 0.02 | 0.12 | 0.01 | 6.5  | 12.1 | 6.3  | 100.8 |
| 1124E/11     | 76.0 | 0.05 | 0.13 | 0.02 | 7.5  | 8.8  | 7.0  | 99.5  |
| 1124E/11     | 76.1 | 0.00 | 0.07 | 0.01 | 9.3  | 8.2  | 6.5  | 100.2 |
| 1124E/12     | 75.0 | 0.01 | 0.15 | 0.01 | 7.0  | 14.4 | 7.0  | 103.5 |
| 1124E/12     | 73.7 | 0.00 | 0.17 | 0.01 | 7.0  | 13.1 | 9.0  | 103.1 |
| 1124E/12     | 62.8 | 0.00 | 0.10 | 2.41 | 6.0  | 8.0  | 17.3 | 96.6  |
| 1124E/12     | 76.4 | 0.02 | 0.28 | 0.00 | 10.0 | 12.8 | 4.0  | 103.6 |
| 1124E/12     | 75.7 | 0.04 | 0.26 | 0.00 | 8.5  | 10.9 | 4.7  | 100.1 |
| 1124E/12     | 75.0 | 0.00 | 0.10 | 0.01 | 2.5  | 14.9 | 7.4  | 99.9  |
| Crn18/479-2  | 72.2 | 0.09 | 0.51 | 0.67 | 5.6  | 12.5 | 5.4  | 97.9  |
| Crn18/479-2  | 73.0 | 0.04 | 0.31 | 0.03 | 1.5  | 17.0 | 6.3  | 98.6  |
| Crn18/479-2  | 72.2 | 0.00 | 0.28 | 0.80 | 1.6  | 18.8 | 6.1  | 99.8  |
| Crn18/479-2  | 76.1 | 0.03 | 0.20 | 0.00 | 0.6  | 20.4 | 1.7  | 99.1  |
| Crn18/479-2  | 71.3 | 0.00 | 0.00 | 0.08 | 0.8  | 11.9 | 14.8 | 99.0  |
| Crn18/479-2  | 75.5 | 0.03 | 0.00 | 0.01 | 1.4  | 15.5 | 7.6  | 100.1 |
| Crn18/479-2  | 73.3 | 0.00 | 0.04 | 0.09 | 1.0  | 13.4 | 14.2 | 102.1 |
| Crn18/479-6  | 76.2 | 0.00 | 0.46 | 0.00 | 3.0  | 18.8 | 2.3  | 100.9 |
| Crn18/479-6  | 74.6 | 0.03 | 0.50 | 0.00 | 3.6  | 17.3 | 4.0  | 100.1 |
| Crn18/479-6  | 76.2 | 0.08 | 0.43 | 0.00 | 4.9  | 16.3 | 2.8  | 100.8 |
| Crn18/479-6  | 76.1 | 0.00 | 0.39 | 0.00 | 4.4  | 15.5 | 2.8  | 99.2  |
| Crn18/479-7  | 77.4 | 0.02 | 0.06 | 0.00 | 5.9  | 13.6 | 5.1  | 102.2 |
| Crn18/479-7  | 77.2 | 0.00 | 0.11 | 0.01 | 5.5  | 12.7 | 5.4  | 100.8 |
| Crn18/479-7  | 76.7 | 0.01 | 0.12 | 0.00 | 8.5  | 10.2 | 6.1  | 101.7 |
| Crn18/479-7  | 76.0 | 0.01 | 0.12 | 0.00 | 7.5  | 10.1 | 7.9  | 101.6 |
| Crn18/479-10 | 75.8 | 0.00 | 0.14 | 0.02 | 2.0  | 19.0 | 2.0  | 99.0  |
| Crn18/479-10 | 76.5 | 0.00 | 0.15 | 0.00 | 1.5  | 19.5 | 1.8  | 99.5  |
| Crn18/479-14 | 77.2 | 0.01 | 0.08 | 0.01 | 6.0  | 13.1 | 2.7  | 99.2  |
| Crn18/479-16 | 76.4 | 0.05 | 0.05 | 0.01 | 6.4  | 13.1 | 3.3  | 99.3  |
| Crn18/479-16 | 77.1 | 0.06 | 0.06 | 0.00 | 4.3  | 16.5 | 2.0  | 100.1 |
| Crn18/479-19 | 75.9 | 0.04 | 0.23 | 0.00 | 6.2  | 12.5 | 6.0  | 100.8 |
| Crn18/479-20 | 75.5 | 0.00 | 0.04 | 0.01 | 1.5  | 18.0 | 4.5  | 99.6  |
| Crn18/479-23 | 76.3 | 0.00 | 0.00 | 0.00 | 0.6  | 19.1 | 3.1  | 99.1  |
| Crn18/479-23 | 75.5 | 0.06 | 0.33 | 0.01 | 0.0  | 19.4 | 4.0  | 99.3  |
| Crn18/479-23 | 76.7 | 0.02 | 0.00 | 0.01 | 1.0  | 18.9 | 3.8  | 100.4 |
| Crn18/198-8  | 72.1 | 0.00 | 0.00 | 0.01 | 2.5  | 11.8 | 12.8 | 99.3  |
| Crn18/198-5  | 76.9 | 0.00 | 0.11 | 0.00 | 5.3  | 12.2 | 3.5  | 98.1  |
| Crn18/479-7  | 71.7 | 0.00 | 0.12 | 0.20 | 1.0  | 12.1 | 15.0 | 100.2 |
| Crn18/479-7  | 74.7 | 0.00 | 0.09 | 0.00 | 1.2  | 16.0 | 7.4  | 99.4  |
| Crn18/479-7  | 75.9 | 0.00 | 0.09 | 0.00 | 2.6  | 15.3 | 4.61 | 100.0 |
| Mt 1/982B-1  | 75.5 | 0.00 | 0.04 | 0.00 | 3.5  | 12.4 | 9.2  | 100.6 |
| Mt 1/982B-2  | 73.7 | 0.00 | 0.10 | 0.20 | 4.7  | 9.5  | 13.2 | 101.4 |
| Mt 1/982B-3  | 75.8 | 0.01 | 0.17 | 0.53 | 7.0  | 11.1 | 7.5  | 102.2 |

|             |      |      |      |      |     |      |     |       |
|-------------|------|------|------|------|-----|------|-----|-------|
| Mt 1/982B-4 | 74.8 | 0.09 | 0.00 | 0.01 | 3.4 | 11.4 | 11  | 100.7 |
| Mt 1/982C-5 | 74.4 | 0.04 | 0.30 | 0.09 | 0.0 | 19.0 | 8.8 | 102.7 |
| Mt 1/982C-6 | 74.4 | 0.00 | 0.30 | 0.1  | 1.0 | 20.7 | 3.7 | 100.3 |

|               | Ti<br>atomic<br>% | Cr   | V    | Si   | C    | N    | O    |                      |
|---------------|-------------------|------|------|------|------|------|------|----------------------|
| Mt 1 1124/2-1 | 48.1              |      | 0.01 |      | 9.5  | 31.6 | 10.9 | sg                   |
| Mt 1 1124/2-2 | 47.4              | 0.05 | 0.20 | 0.01 | 19.6 | 25.0 | 7.7  | sg                   |
| Mt 1 1124/2-3 | 48.5              |      | 0.01 |      | 8.8  | 31.8 | 11.0 | sg                   |
| 1124A/3       | 47.7              |      | 0.09 | 0.01 |      | 35.6 | 16.7 | lg                   |
| 1124A/3       | 49.1              | 0.02 | 0.05 |      |      | 35.4 | 15.5 | lg                   |
| 1124A/3       | 47.1              |      | 0.02 | 0.01 |      | 35.3 | 17.6 | lg                   |
| 1124A/3       | 46.0              |      | 0.03 | 0.12 | 2.5  | 31.0 | 20.4 | lg                   |
| 1124A/3       | 48.2              |      | 0.07 | 0.01 |      | 35.4 | 16.3 | lg                   |
| 1124A/10      | 43.3              |      | 0.07 |      |      | 32.7 | 24.0 | im                   |
| 1124A/11      | 49.4              |      | 0.08 | 0.01 |      | 37.3 | 13.4 | cross in pocket      |
| 1124A/11      | 49.4              | 0.02 | 0.06 | 0.01 | 7.6  | 31.0 | 11.8 | lg                   |
| 1124B/15      | 46.3              |      | 0.04 | 0.02 | 6.2  | 30.0 | 17.4 | im +TiB2             |
| 1124B/15      | 46.9              |      | 0.05 | 0.02 | 5.0  | 31.1 | 16.9 | cross in pocket+TiB2 |
| 1124B/7       | 48.2              |      | 0.29 | 0.26 | 15.3 | 21.2 | 14.7 | silicide + TiB2      |
| 1124B/7       | 44.4              |      | 0.13 | 0.01 | 12.4 | 26.1 | 17.0 | cross in pocket      |
| 1124B/3       | 45.6              | 0.13 | 0.64 | 0.4  | 6.3  | 33.0 | 13.6 | lg in pocket         |
| 1124B/3       | 46.5              | 0.05 | 0.13 | 0.01 | 17.0 | 26.7 | 9.3  | int                  |
| 1124C/1       | 49.3              | 0.02 | 0.05 | 0.01 | 5.3  | 28.2 | 16.8 | sg                   |
| 1124C/1       | 49.8              | 0.01 | 0.04 | 0.01 | 10.3 | 30.5 | 9.3  | sg                   |
| 1124C/1       | 50.5              | 0.02 | 0.04 | 0.01 | 13.1 | 26.4 | 9.8  | sg                   |
| 1124C/3       | 48.1              | 0.02 | 0.07 |      |      | 35.9 | 15.9 | cross                |
| 1124C/3       | 47.2              |      | 0.04 | 0.02 |      | 32.3 | 20.5 | cross                |
| 1124C/3       | 50.9              | 0.04 | 0.21 |      |      | 35.5 | 13.3 | cross                |
| 1124C/3       | 50.5              | 0.02 | 0.14 |      |      | 34.9 | 14.4 | cross                |
| 1124C/4       | 48.6              | 0.01 | 0.09 |      | 2.6  | 38.1 | 10.6 | cf                   |
| 1124C/4       | 47.5              | 0.01 | 0.04 | 0.01 |      | 33.2 | 19.1 | cf                   |
| 1124C/8       | 51.4              |      | 0.13 |      |      | 40.1 | 8.3  | cross                |
| 1124C/8       | 46.8              |      | 0.06 | 0.01 |      | 33.1 | 19.8 | cross                |
| 1124C/9       | 47.3              |      | 0.01 | 0.03 |      | 28.8 | 23.8 | cross                |
| 1124C/9       | 47.1              | 0.01 | 0.05 | 0.01 |      | 32.3 | 20.5 | sg                   |
| 1124C/9       | 47.2              |      | 0.04 | 0.01 |      | 31.8 | 21.0 | sg                   |
| 1124C/9       | 46.7              | 0.02 | 0.04 | 0.02 |      | 31.0 | 22.2 | cf                   |
| 1124C/9       | 46.7              | 0.01 | 0.04 | 0.02 | 0.6  | 30.7 | 22.0 | sg                   |

|              |      |      |      |      |      |      |      |              |
|--------------|------|------|------|------|------|------|------|--------------|
| 1124D/1      | 49.2 |      | 0.06 | 0.01 | 5.2  | 29.3 | 16.2 | cf           |
| 1124D/1      | 47.5 | 0.01 | 0.06 | 0.01 | 4.3  | 32.8 | 15.3 | cross        |
| 1124D/1      | 46.8 | 0.03 | 0.02 | 0.02 |      | 30.6 | 22.4 | cf           |
| 1124D/2      | 50.3 |      | 0.10 | 0.02 |      | 40.6 | 8.9  | cf           |
| 1124D/2      | 44.9 | 0.03 | 0.06 | 0.03 | 6.2  | 29.3 | 19.6 | cross        |
| 1124D/2      | 48.2 |      | 0.05 | 0.02 | 4.4  | 31.9 | 15.4 | cross        |
| 1124D/2      | 46.6 |      | 0.12 | 0.33 | 5.4  | 28.2 | 19.3 | cross        |
| 1124D/4      | 44.8 |      | 0.10 | 0.06 | 4.9  | 29.0 | 21.2 | cross        |
| 1124E/1      | 46.7 | 0.02 | 0.07 | 0.01 | 16.0 | 25.5 | 11.6 | sil+TiB      |
| 1124E/11     | 48.3 | 0.03 | 0.08 | 0.02 | 19.0 | 19.2 | 13.3 | sil          |
| 1124E/11     | 47.4 |      | 0.04 | 0.01 | 23.1 | 17.4 | 12.1 | lg in pocket |
| 1124E/12     | 42.5 | 0.01 | 0.08 | 0.01 | 15.8 | 27.9 | 13.6 | sg           |
| 1124E/12     | 42.5 |      | 0.09 | 0.01 | 16.1 | 25.8 | 15.5 | cf           |
| 1124E/12     | 36.9 |      | 0.06 | 2.42 | 14.1 | 16.1 | 30.5 | cf           |
| 1124E/12     | 44.3 | 0.02 | 0.15 |      | 23.1 | 25.4 | 7.0  | sil          |
| 1124E/12     | 46.7 | 0.02 | 0.15 |      | 21.0 | 23.2 | 8.8  | sil          |
| 1124E/12     | 47.4 |      | 0.06 | 0.01 | 6.3  | 32.2 | 14.0 | TiB2, sil    |
| Crn18/479-2  | 45.8 | 0.05 | 0.3  | 0.71 | 14.1 | 27.1 | 10.2 | lg           |
| Crn18/479-2  | 46.6 | 0.05 | 0.19 | 0.03 | 3.8  | 37.2 | 12.0 | inclti       |
| Crn18/479-2  | 44.4 |      | 0.16 | 0.84 | 3.9  | 39.4 | 11.2 | im           |
| Crn18/479-2  | 49.5 | 0.02 | 0.12 |      | 1.6  | 45.4 | 3.3  | im           |
| Crn18/479-2  | 44.7 |      |      | 0.09 | 1.9  | 25.6 | 27.8 | im           |
| Crn18/479-2  | 48.2 | 0.02 |      | 0.01 | 3.6  | 33.8 | 14.5 | im           |
| Crn18/479-2  | 44.2 |      | 0.02 | 0.09 | 2.4  | 27.7 | 25.6 | im           |
| Crn18/479-6  | 47.6 |      | 0.27 |      | 7.5  | 40.2 | 4.3  | inclti       |
| Crn18/479-6  | 46.4 | 0.02 | 0.28 |      | 8.9  | 36.8 | 7.5  | sg           |
| Crn18/479-6  | 47.5 | 0.05 | 0.25 |      | 12.2 | 34.8 | 5.2  | cf           |
| Crn18/479-6  | 49.1 |      | 0.24 |      | 11.3 | 34.0 | 5.4  | sg           |
| Crn18/479-7  | 47.5 | 0.01 | 0.03 |      | 14.4 | 28.6 | 9.4  | sg           |
| Crn18/479-7  | 48.7 |      | 0.07 |      | 13.7 | 27.4 | 10.1 | sg           |
| Crn18/479-7  | 46.8 | 0.01 | 0.07 |      | 20.7 | 21.3 | 11.1 | sg           |
| Crn18/479-7  | 46.3 | 0.01 | 0.07 |      | 18.2 | 21.0 | 14.4 | cf           |
| Crn18/479-10 | 49.0 |      | 0.09 | 0.02 | 5.2  | 41.9 | 3.9  | cf           |
| Crn18/479-10 | 49.6 |      | 0.09 |      | 3.9  | 42.9 | 3.5  | sg           |
| Crn18/479-14 | 50.1 | 0.01 | 0.05 | 0.01 | 15.5 | 29.1 | 5.2  | sil          |
| Crn18/479-16 | 48.7 | 0.03 | 0.03 | 0.01 | 16.3 | 28.6 | 6.3  | sil          |
| Crn18/479-16 | 49.2 | 0.04 | 0.04 |      | 10.9 | 36.0 | 3.8  | sil          |
| Crn18/479-19 | 47.0 | 0.02 | 0.13 |      | 15.3 | 26.5 | 11.1 | sil          |
| Crn18/479-20 | 48.3 |      | 0.02 | 0.01 | 3.8  | 39.2 | 8.6  | sg           |
| Crn18/479-23 | 49.8 |      |      |      | 1.6  | 42.6 | 6.1  | sg           |
| Crn18/479-23 | 49.0 | 0.04 | 0.20 | 0.01 |      | 43.0 | 7.8  | sg           |
| Crn18/479-23 | 49.0 | 0.01 |      | 0.01 | 2.6  | 41.2 | 7.3  | sg           |
| Crn18/198-8  | 45.5 |      |      | 0.01 | 6.1  | 24.8 | 23.5 | cf           |

|             |      |      |      |      |      |      |      |     |
|-------------|------|------|------|------|------|------|------|-----|
| Crn18/198-5 | 51.1 |      | 0.07 |      | 14.0 | 27.8 | 7.0  | cf  |
| Crn18/479-7 | 43.9 |      | 0.07 | 0.21 | 2.5  | 25.6 | 27.7 | lg  |
| Crn18/479-7 | 47.8 |      | 0.05 |      | 3.1  | 35.0 | 14.2 | lg  |
| Crn18/479-7 | 49.8 |      | 0.06 |      | 6.8  | 34.4 | 9.0  | sg  |
| Mt 1/982B-1 | 47.3 |      | 0.03 |      | 8.8  | 26.6 | 17.3 | im  |
| Mt 1/982B-2 | 44.7 |      | 0.06 | 0.21 | 11.4 | 19.7 | 24.0 | im  |
| Mt 1/982B-3 | 45.8 | 0.01 | 0.10 | 0.55 | 16.9 | 23.1 | 13.6 | im  |
| Mt 1/982B-4 | 46.7 | 0.05 |      | 0.01 | 8.5  | 24.3 | 20.5 | sil |
| Mt 1/982C-5 | 44.8 | 0.02 | 0.17 | 0.09 |      | 39.0 | 15.9 | sg  |
| Mt 1/982C-6 | 46.4 |      | 0.18 | 0.01 | 2.5  | 44.0 | 6.9  | sg  |

Type\*

**lg, large inclusion in corundum or melt inclusion**

**sg, small inclusions (3-5  $\mu$ ) in corundum**

**cf, cavity fill in skeletal corundum**

**im, immiscible boundary to glass**

**sil, intergrown with silicide**

**int, interstitial; inclti, included in tistarite**
