# Supplementary material
Source: MDPI journal article supplement (https://www.mdpi.com/2075-163X/11/7/780)
Supplement: s1 [file s1]

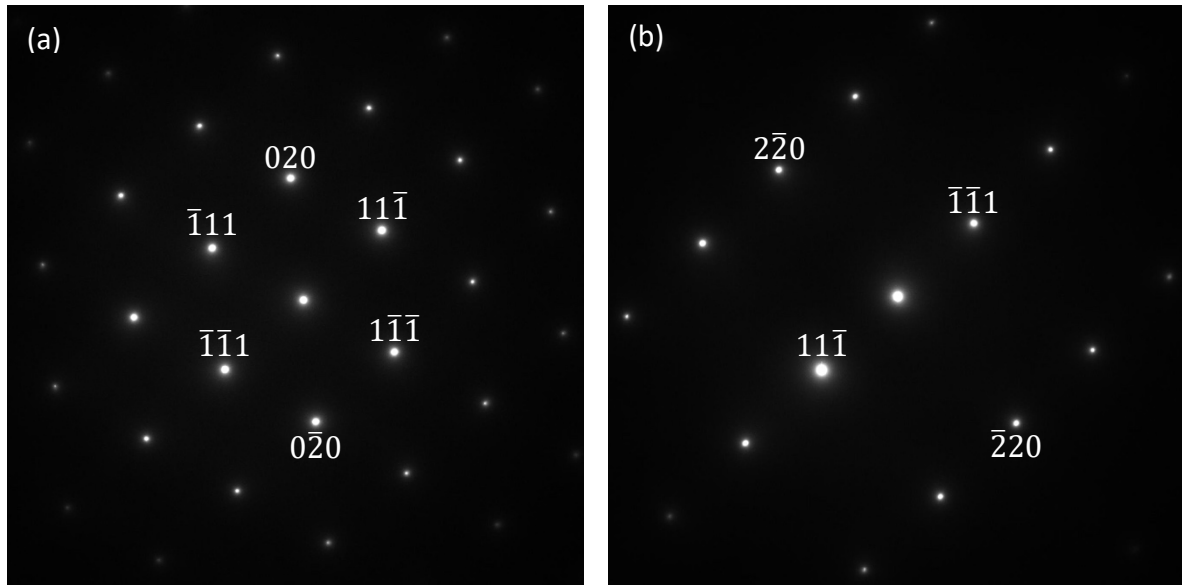

Figure caption: Selected area electron diffraction patterns from two zone axes obtained by tilting the same grain of the titanium nitride phase. The patterns can be indexed as the (a) [110] and (b) [112] zone axes of Osbornite (fcc TiN).
